# Supplementary material
Source: HighWire-hosted journal article supplement (https://erj.ersjournals.com/content/56/5/2003408)
Supplement: inline-supplementary-material-1 [file inline-supplementary-material-1.pdf]

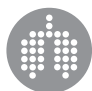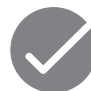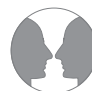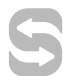

SHAREABLE PDF

# A profile of a retrospective cohort of 22 patients with COVID-19 and active/treated tuberculosis

Nitesh Gupta<sup>1</sup>, Pranav Ish<sup>1</sup>, Amitesh Gupta<sup>2</sup>, Nipun Malhotra<sup>1</sup>, Jose Antonio Caminero<sup>3,4</sup>, Rupak Singla<sup>5</sup>, Rohit Kumar<sup>1</sup>, Siddharth Raj Yadav<sup>1</sup>, Nishanth Dev<sup>6</sup>, Sumita Agrawal<sup>7</sup>, Santvana Kohli<sup>8</sup> , M.K. Sen<sup>1</sup>, Shibdas Chakrabarti<sup>1</sup> and N.K. Gupta<sup>1</sup>

**Affiliations:** <sup>1</sup>Pulmonary Medicine, Safdarjung Hospital, New Delhi, India. <sup>2</sup>National Institute of Tuberculosis and Respiratory Diseases, New Delhi, India. <sup>3</sup>Dept of Pneumology, Dr Negrín University Hospital of Gran Canaria, Las Palmas de Gran Canaria, Spain. <sup>4</sup>MDR-TB Unit, Tuberculosis Division, International Union against Tuberculosis and Lung Disease, Paris, France. <sup>5</sup>Dept of Tuberculosis and Respiratory Diseases, National Institute of Tuberculosis and Respiratory Diseases, New Delhi, India. <sup>6</sup>Medicine, Safdarjung Hospital, New Delhi, India. <sup>7</sup>Pulmonary Medicine, Medipulse Hospital, Jodhpur, India. <sup>8</sup>Anaesthesiology, Safdarjung Hospital, New Delhi, India.

**Correspondence:** Nitesh Gupta, Room number 638, Dept of Pulmonary Medicine, Safdarjung Hospital, New Delhi-110029, India. E-mail: niteshgupta2107@gmail.com

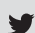

@ERSpublications

**Both tuberculosis and COVID-19 being communicable and prevalent diseases in India, the co-existence can lead to worse outcomes, as seen in this study, where there was high mortality among active as well as treated TB patients with COVID-19 co-infection** <https://bit.ly/3jHcGbQ>

**Cite this article as:** Gupta N, Ish P, Gupta A, *et al.* A profile of a retrospective cohort of 22 patients with COVID-19 and active/treated tuberculosis. *Eur Respir J* 2020; 56: 2003408 [<https://doi.org/10.1183/13993003.03408-2020>].

This single-page version can be shared freely online.

## To the Editor:

We read with interest the two articles by TADOLINI *et al.* [1] and STOCHINO *et al.* [2], which described recent cohorts of either current or former tuberculosis (TB) patients with coronavirus disease 2019 (COVID-19) and studied their clinical course. India has the majority of global burden of TB, along with highest rising number of daily COVID-19 cases in the world [3, 4]. The information about COVID-19 and active/former TB co-infection reported so far is sparse, but it can be assumed that person with TB, when co-infected with COVID-19, may be at more risk of poor outcomes [1, 5]. The present study describes the first-ever cohort of current or treated TB patients co-infected with COVID-19 from a high TB burden country, recruited by a tertiary care hospital in India.
